# Supplementary material for: Virtual screening of GPCRs: An in silico chemogenomics approach
Source: PubMed Central journal article supplement (PMC2553090; doi:10.1186/1471-2105-9-363), 2008-09-06
Supplement: 1471-2105-9-363-S1.pdf [file 1471-2105-9-363-S1.pdf]

| positions on $\beta_2$ -adrenergic receptor | 82 | 109 | 110 | 113 | 114 | 115 | 116 | 117 | 118 | 121 | 175 | 183 | 195 | 199 | 200 |
|---------------------------------------------|----|-----|-----|-----|-----|-----|-----|-----|-----|-----|-----|-----|-----|-----|-----|
| $\beta_2$ -adrenergic receptor              | M  | W   | T   | D   | V   | L   | C   | V   | T   | I   | R   | N   | T   | Y   | A   |
| 5-hydroxytryptamine 5A receptor             | V  | W   | I   | D   | V   | L   | C   | C   | T   | I   | I   | E   | S   | Y   | A   |
| Adenosine A2b receptor                      | V  | L   | A   | V   | L   | V   | L   | T   | Q   | I   | I   | K   | K   | M   | V   |
| Gamma-aminobutyric acid type B receptor     | E  | D   | E   | E   | A   | V   | E   | G   | H   | T   | L   | G   | S   | F   | D   |
| Relaxin 3 receptor 2                        | L  | V   | L   | T   | V   | L   | N   | V   | Y   | I   | V   | G   | L   | Y   | Q   |

| positions on $\beta_2$ -adrenergic receptor | 203 | 204 | 207 | 208 | 212 | 282 | 286 | 289 | 290 | 293 | 308 | 311 | 312 | 313 | 315 | 316 |
|---------------------------------------------|-----|-----|-----|-----|-----|-----|-----|-----|-----|-----|-----|-----|-----|-----|-----|-----|
| $\beta_2$ -adrenergic receptor              | S   | S   | S   | F   | L   | F   | W   | F   | F   | N   | Y   | L   | N   | W   | G   | Y   |
| 5-hydroxytryptamine 5A receptor             | S   | T   | A   | F   | L   | F   | W   | F   | F   | E   | K   | F   | L   | W   | G   | Y   |
| Adenosine A2b receptor                      | N   | F   | C   | V   | L   | F   | W   | V   | H   | N   | M   | A   | I   | L   | S   | H   |
| Gamma-aminobutyric acid type B receptor     | G   | S   | A   | W   | E   | F   | L   | Y   | H   | R   | L   | T   | V   | G   | L   | V   |
| Relaxin 3 receptor 2                        | R   | V   | A   | F   | L   | F   | W   | N   | H   | T   | F   | T   | T   | C   | A   | H   |
