# Supplementary material for: Virtual screening of GPCRs: An in silico chemogenomics approach
Source: PubMed Central journal article supplement (PMC2553090; doi:10.1186/1471-2105-9-363), 2008-09-06
Supplement: 1471-2105-9-363-S3.pdf [file 1471-2105-9-363-S3.pdf]

| GPCR \ $K_{tar}$            | Dirac       | multitask   | hierarchy   | BP          | PBP         |
|-----------------------------|-------------|-------------|-------------|-------------|-------------|
| Rhodopsin peptide receptors |             |             |             |             |             |
| AG2R(5)                     | 100.0 ± 0.0 | 100.0 ± 0.0 | 100.0 ± 0.0 | 100.0 ± 0.0 | 100.0 ± 0.0 |
| CCKAR(6)                    | 100.0 ± 0.0 | 100.0 ± 0.0 | 100.0 ± 0.0 | 100.0 ± 0.0 | 100.0 ± 0.0 |
| CML2(1)                     | 50.0 ± 0.0  | 50.0 ± 35.4 | 100.0 ± 0.0 | 50.0 ± 35.4 | 50.0 ± 35.4 |
| CXCR3(1)                    | 50.0 ± 35.4 | 0.0 ± 0.0   | 50.0 ± 35.4 | 50.0 ± 35.4 | 50.0 ± 35.4 |
| EDNRA(50)                   | 100.0 ± 0.0 | 99.0 ± 0.9  | 100.0 ± 0.0 | 100.0 ± 0.0 | 100.0 ± 0.0 |
| EDNRB(48)                   | 96.9 ± 1.1  | 91.8 ± 3.4  | 98.0 ± 1.1  | 99.0 ± 0.9  | 99.0 ± 0.9  |
| GASR(2)                     | 100.0 ± 0.0 | 75.0 ± 21.7 | 75.0 ± 21.7 | 75.0 ± 21.7 | 75.0 ± 21.7 |
| GPR7(1)                     | 50.0 ± 35.4 | 50.0 ± 35.4 | 50.0 ± 35.4 | 50.0 ± 35.4 | 50.0 ± 35.4 |
| LSHR(4)                     | 70.0 ± 11.0 | 70.0 ± 11.0 | 70.0 ± 11.0 | 70.0 ± 11.0 | 70.0 ± 11.0 |
| NK1R(24)                    | 92.0 ± 4.4  | 82.0 ± 5.2  | 86.0 ± 5.4  | 88.0 ± 3.3  | 86.0 ± 3.6  |
| NK2R(1)                     | 50.0 ± 35.4 | 100.0 ± 0.0 | 100.0 ± 0.0 | 100.0 ± 0.0 | 100.0 ± 0.0 |
| NK3R(1)                     | 50.0 ± 0.0  | 100.0 ± 0.0 | 100.0 ± 0.0 | 100.0 ± 0.0 | 100.0 ± 0.0 |
| OPRD(27)                    | 92.3 ± 1.7  | 86.7 ± 4.4  | 90.3 ± 4.9  | 90.3 ± 2.8  | 90.3 ± 2.8  |
| OPRK(24)                    | 96.0 ± 3.6  | 98.0 ± 1.8  | 98.0 ± 1.8  | 98.0 ± 1.8  | 98.0 ± 1.8  |
| OPRM(21)                    | 100.0 ± 0.0 | 97.5 ± 2.2  | 97.5 ± 2.2  | 97.5 ± 2.2  | 97.5 ± 2.2  |
| OXYR(3)                     | 90.0 ± 8.9  | 100.0 ± 0.0 | 90.0 ± 8.9  | 100.0 ± 0.0 | 100.0 ± 0.0 |
| SSR1(3)                     | 90.0 ± 8.9  | 90.0 ± 8.9  | 90.0 ± 8.9  | 90.0 ± 8.9  | 90.0 ± 8.9  |
| CCR3(1)                     | 50.0 ± 35.4 | 50.0 ± 35.4 | 50.0 ± 35.4 | 50.0 ± 35.4 | 50.0 ± 35.4 |
| Rhodopsin amine receptors   |             |             |             |             |             |
| 5HT1A(196)                  | 91.6 ± 1.3  | 90.1 ± 2.2  | 88.8 ± 0.8  | 91.8 ± 1.5  | 90.8 ± 1.7  |
| 5HT1B(28)                   | 82.7 ± 3.0  | 96.0 ± 3.6  | 98.0 ± 1.8  | 100.0 ± 0.0 | 100.0 ± 0.0 |
| 5HT1D(172)                  | 93.3 ± 1.0  | 92.4 ± 0.9  | 92.7 ± 0.9  | 94.8 ± 0.7  | 94.8 ± 0.7  |
| 5HT1E(16)                   | 87.5 ± 5.5  | 90.8 ± 3.4  | 96.7 ± 3.0  | 90.8 ± 3.4  | 90.8 ± 3.4  |
| 5HT1F(49)                   | 86.7 ± 1.2  | 90.9 ± 0.8  | 88.8 ± 1.7  | 92.9 ± 1.1  | 91.7 ± 2.1  |
| 5HT2A(79)                   | 94.9 ± 1.4  | 95.6 ± 1.4  | 93.0 ± 1.7  | 94.3 ± 1.7  | 94.9 ± 1.4  |
| 5HT2B(72)                   | 81.2 ± 3.3  | 78.3 ± 2.9  | 83.9 ± 1.8  | 83.2 ± 2.0  | 83.2 ± 2.0  |
| 5HT2C(198)                  | 88.6 ± 1.2  | 86.8 ± 1.2  | 89.4 ± 1.4  | 89.6 ± 0.8  | 90.1 ± 1.3  |
| 5HT4R(87)                   | 92.5 ± 2.0  | 86.7 ± 2.5  | 85.7 ± 2.0  | 87.9 ± 2.1  | 89.0 ± 2.0  |
| 5HT5A(7)                    | 80.0 ± 8.4  | 75.0 ± 10.0 | 75.0 ± 10.0 | 75.0 ± 10.0 | 75.0 ± 10.0 |
| 5HT6R(13)                   | 95.0 ± 4.5  | 96.7 ± 3.0  | 91.7 ± 4.7  | 95.0 ± 4.5  | 100.0 ± 0.0 |
| 5HT7R(15)                   | 90.0 ± 6.0  | 90.0 ± 3.7  | 96.7 ± 3.0  | 93.3 ± 3.7  | 93.3 ± 3.7  |
| ACM1(527)                   | 96.7 ± 0.6  | 94.3 ± 0.9  | 95.5 ± 1.0  | 96.1 ± 0.7  | 96.1 ± 0.8  |
| ACM2(24)                    | 82.0 ± 5.2  | 90.0 ± 2.8  | 92.0 ± 3.3  | 94.0 ± 3.6  | 92.0 ± 3.3  |
| ACM3(58)                    | 93.2 ± 2.6  | 90.5 ± 0.7  | 91.3 ± 1.3  | 96.4 ± 1.5  | 95.6 ± 1.3  |
| ACM4(21)                    | 90.0 ± 5.5  | 95.0 ± 2.7  | 95.0 ± 2.7  | 92.5 ± 2.7  | 95.0 ± 2.7  |
| ACM5(16)                    | 94.2 ± 3.2  | 94.2 ± 3.2  | 100.0 ± 0.0 | 100.0 ± 0.0 | 100.0 ± 0.0 |
| ADA1A(80)                   | 93.1 ± 2.1  | 98.8 ± 0.7  | 99.4 ± 0.6  | 98.1 ± 0.7  | 98.8 ± 0.7  |
| ADA1B(67)                   | 90.5 ± 3.7  | 95.7 ± 1.9  | 98.6 ± 0.8  | 97.0 ± 0.7  | 97.0 ± 0.7  |
| ADA1D(73)                   | 90.4 ± 2.4  | 96.0 ± 1.1  | 98.7 ± 0.7  | 98.0 ± 0.7  | 98.0 ± 0.7  |
| ADA2A(234)                  | 95.7 ± 0.5  | 96.8 ± 0.3  | 98.5 ± 0.2  | 98.5 ± 0.2  | 98.5 ± 0.2  |
| ADA2B(224)                  | 95.1 ± 1.2  | 95.5 ± 1.3  | 98.2 ± 0.7  | 98.2 ± 0.7  | 98.0 ± 0.7  |
| ADA2C(225)                  | 95.3 ± 0.4  | 96.4 ± 0.4  | 97.6 ± 0.4  | 97.6 ± 0.4  | 97.8 ± 0.3  |
| ADRB1(50)                   | 98.0 ± 1.1  | 97.0 ± 1.8  | 99.0 ± 0.9  | 99.0 ± 0.9  | 99.0 ± 0.9  |
| ADRB2(48)                   | 92.8 ± 1.9  | 95.9 ± 0.9  | 96.9 ± 1.1  | 98.0 ± 1.1  | 98.0 ± 1.1  |
| ADRB3(57)                   | 98.2 ± 1.0  | 95.5 ± 2.2  | 97.3 ± 1.6  | 97.3 ± 1.6  | 97.3 ± 1.6  |
| DRD1(100)                   | 93.5 ± 1.8  | 94.5 ± 1.5  | 95.0 ± 1.4  | 94.5 ± 1.3  | 94.5 ± 1.3  |
| DRD2(106)                   | 93.4 ± 0.8  | 92.9 ± 1.8  | 92.4 ± 1.6  | 91.5 ± 1.7  | 91.9 ± 1.9  |
| DRD3(41)                    | 86.7 ± 2.6  | 89.2 ± 3.1  | 89.3 ± 3.8  | 90.4 ± 3.2  | 91.5 ± 2.8  |
| DRD4(143)                   | 92.3 ± 0.8  | 92.7 ± 1.1  | 93.7 ± 1.3  | 93.7 ± 1.4  | 94.1 ± 1.3  |
| DRD5(7)                     | 95.0 ± 4.5  | 100.0 ± 0.0 | 100.0 ± 0.0 | 100.0 ± 0.0 | 100.0 ± 0.0 |
| HRH1(19)                    | 89.2 ± 4.3  | 92.5 ± 2.7  | 86.7 ± 0.7  | 92.5 ± 2.7  | 92.5 ± 2.7  |
| HRH2(22)                    | 91.0 ± 3.5  | 93.5 ± 3.7  | 96.0 ± 3.6  | 96.0 ± 3.6  | 96.0 ± 3.6  |
| HRH3(88)                    | 97.2 ± 0.8  | 96.1 ± 1.3  | 97.7 ± 0.9  | 97.7 ± 0.5  | 97.7 ± 0.5  |
| HRH4(5)                     | 80.0 ± 11.0 | 70.0 ± 17.9 | 100.0 ± 0.0 | 80.0 ± 11.0 | 80.0 ± 11.0 |

| GPCR \ $K_{tar}$              | Dirac           | multitask       | hierarchy       | BP              | PBP             |
|-------------------------------|-----------------|-----------------|-----------------|-----------------|-----------------|
| Rhodopsin other receptors     |                 |                 |                 |                 |                 |
| AA1R(56)                      | $96.4 \pm 1.5$  | $96.4 \pm 0.8$  | $96.4 \pm 1.5$  | $97.3 \pm 1.0$  | $97.3 \pm 1.0$  |
| AA2AR(73)                     | $96.0 \pm 1.7$  | $97.3 \pm 1.1$  | $98.6 \pm 0.8$  | $98.0 \pm 1.2$  | $98.0 \pm 1.2$  |
| AA2BR(83)                     | $97.6 \pm 1.0$  | $98.2 \pm 0.7$  | $99.4 \pm 0.6$  | $99.4 \pm 0.6$  | $99.4 \pm 0.6$  |
| AA3R(17)                      | $97.5 \pm 2.2$  | $82.5 \pm 1.8$  | $94.2 \pm 3.2$  | $95.0 \pm 4.5$  | $95.0 \pm 4.5$  |
| CLTR1(18)                     | $89.2 \pm 2.5$  | $84.2 \pm 4.1$  | $89.2 \pm 4.3$  | $91.7 \pm 3.1$  | $91.7 \pm 3.1$  |
| LT4R1(2)                      | $50.0 \pm 25.0$ | $50.0 \pm 25.0$ | $100.0 \pm 0.0$ | $100.0 \pm 0.0$ | $100.0 \pm 0.0$ |
| LT4R2(2)                      | $50.0 \pm 25.0$ | $50.0 \pm 25.0$ | $100.0 \pm 0.0$ | $100.0 \pm 0.0$ | $100.0 \pm 0.0$ |
| MTR1A(91)                     | $97.3 \pm 1.1$  | $96.8 \pm 1.4$  | $100.0 \pm 0.0$ | $100.0 \pm 0.0$ | $100.0 \pm 0.0$ |
| MTR1B(90)                     | $97.8 \pm 0.9$  | $97.8 \pm 0.9$  | $99.4 \pm 0.5$  | $99.4 \pm 0.5$  | $99.4 \pm 0.5$  |
| MTR1L(75)                     | $98.7 \pm 0.7$  | $99.3 \pm 0.6$  | $100.0 \pm 0.0$ | $100.0 \pm 0.0$ | $100.0 \pm 0.0$ |
| PAFR(1)                       | $50.0 \pm 35.4$ | $50.0 \pm 35.4$ | $50.0 \pm 35.4$ | $50.0 \pm 35.4$ | $50.0 \pm 35.4$ |
| PE2R1(5)                      | $100.0 \pm 0.0$ | $100.0 \pm 0.0$ | $100.0 \pm 0.0$ | $100.0 \pm 0.0$ | $100.0 \pm 0.0$ |
| PE2R2(7)                      | $100.0 \pm 0.0$ | $95.0 \pm 4.5$  | $100.0 \pm 0.0$ | $100.0 \pm 0.0$ | $100.0 \pm 0.0$ |
| PE2R3(5)                      | $100.0 \pm 0.0$ | $100.0 \pm 0.0$ | $100.0 \pm 0.0$ | $100.0 \pm 0.0$ | $100.0 \pm 0.0$ |
| PE2R4(5)                      | $100.0 \pm 0.0$ | $100.0 \pm 0.0$ | $100.0 \pm 0.0$ | $100.0 \pm 0.0$ | $100.0 \pm 0.0$ |
| R3R2(1)                       | $50.0 \pm 0.0$  | $100.0 \pm 0.0$ | $100.0 \pm 0.0$ | $100.0 \pm 0.0$ | $100.0 \pm 0.0$ |
| TA2R(63)                      | $100.0 \pm 0.0$ | $99.2 \pm 0.7$  | $99.2 \pm 0.7$  | $100.0 \pm 0.0$ | $100.0 \pm 0.0$ |
| Metabotropic glutamate family |                 |                 |                 |                 |                 |
| GABR1(1)                      | $50.0 \pm 0.0$  | $100.0 \pm 0.0$ | $100.0 \pm 0.0$ | $50.0 \pm 35.4$ | $100.0 \pm 0.0$ |
| GABR2(1)                      | $50.0 \pm 0.0$  | $100.0 \pm 0.0$ | $100.0 \pm 0.0$ | $0.0 \pm 0.0$   | $50.0 \pm 35.4$ |
| MGR1(34)                      | $98.3 \pm 1.5$  | $91.4 \pm 4.7$  | $100.0 \pm 0.0$ | $100.0 \pm 0.0$ | $100.0 \pm 0.0$ |
| MGR2(6)                       | $95.0 \pm 4.5$  | $100.0 \pm 0.0$ | $100.0 \pm 0.0$ | $100.0 \pm 0.0$ | $100.0 \pm 0.0$ |
| MGR3(5)                       | $100.0 \pm 0.0$ | $90.0 \pm 8.9$  | $100.0 \pm 0.0$ | $100.0 \pm 0.0$ | $100.0 \pm 0.0$ |
| MGR5(5)                       | $90.0 \pm 8.9$  | $100.0 \pm 0.0$ | $100.0 \pm 0.0$ | $100.0 \pm 0.0$ | $100.0 \pm 0.0$ |
| MGR6(5)                       | $100.0 \pm 0.0$ | $90.0 \pm 8.9$  | $90.0 \pm 8.9$  | $100.0 \pm 0.0$ | $90.0 \pm 8.9$  |
| MGR7(6)                       | $95.0 \pm 4.5$  | $90.0 \pm 8.9$  | $100.0 \pm 0.0$ | $100.0 \pm 0.0$ | $100.0 \pm 0.0$ |
| MGR8(3)                       | $80.0 \pm 17.9$ | $80.0 \pm 17.9$ | $100.0 \pm 0.0$ | $100.0 \pm 0.0$ | $100.0 \pm 0.0$ |
| Secretin family               |                 |                 |                 |                 |                 |
| VIPR1(1)                      | $50.0 \pm 35.4$ | $100.0 \pm 0.0$ | $100.0 \pm 0.0$ | $50.0 \pm 35.4$ | $100.0 \pm 0.0$ |
