# Supplementary material for: Virtual screening of GPCRs: An in silico chemogenomics approach
Source: PubMed Central journal article supplement (PMC2553090; doi:10.1186/1471-2105-9-363), 2008-09-06
Supplement: 1471-2105-9-363-S4.pdf [file 1471-2105-9-363-S4.pdf]

| GPCR \ $K_{tar}$            | Dirac       | multitask   | hierarchy   | BP          | PBP         |
|-----------------------------|-------------|-------------|-------------|-------------|-------------|
| Rhodopsin peptide receptors |             |             |             |             |             |
| AG2R(5)                     | 50.0 ± 50.0 | 50.0 ± 50.0 | 50.0 ± 50.0 | 50.0 ± 50.0 | 50.0 ± 50.0 |
| CCKAR(6)                    | 50.0 ± 50.0 | 50.0 ± 50.0 | 66.7 ± 47.1 | 50.0 ± 50.0 | 50.0 ± 50.0 |
| CML2(1)                     | 50.0 ± 50.0 | 100.0 ± 0.0 | 100.0 ± 0.0 | 100.0 ± 0.0 | 100.0 ± 0.0 |
| CXCR3(1)                    | 50.0 ± 50.0 | 50.0 ± 50.0 | 50.0 ± 50.0 | 50.0 ± 50.0 | 50.0 ± 50.0 |
| EDNRA(50)                   | 50.0 ± 50.0 | 46.0 ± 49.8 | 100.0 ± 0.0 | 100.0 ± 0.0 | 94.0 ± 23.7 |
| EDNRB(48)                   | 50.0 ± 50.0 | 22.9 ± 42.0 | 74.0 ± 43.9 | 95.8 ± 20.0 | 75.0 ± 43.3 |
| GASR(2)                     | 50.0 ± 50.0 | 25.0 ± 43.3 | 75.0 ± 43.3 | 75.0 ± 43.3 | 50.0 ± 50.0 |
| GPR7(1)                     | 50.0 ± 50.0 | 50.0 ± 50.0 | 50.0 ± 50.0 | 100.0 ± 0.0 | 50.0 ± 50.0 |
| LSHR(4)                     | 50.0 ± 50.0 | 0.0 ± 0.0   | 37.5 ± 48.4 | 50.0 ± 50.0 | 37.5 ± 48.4 |
| NK1R(24)                    | 50.0 ± 50.0 | 27.1 ± 44.4 | 33.3 ± 47.1 | 60.4 ± 48.9 | 39.6 ± 48.9 |
| NK2R(1)                     | 50.0 ± 50.0 | 100.0 ± 0.0 | 100.0 ± 0.0 | 100.0 ± 0.0 | 100.0 ± 0.0 |
| NK3R(1)                     | 50.0 ± 50.0 | 100.0 ± 0.0 | 100.0 ± 0.0 | 100.0 ± 0.0 | 100.0 ± 0.0 |
| OPRD(27)                    | 50.0 ± 50.0 | 37.0 ± 48.3 | 44.4 ± 49.7 | 55.6 ± 49.7 | 55.6 ± 49.7 |
| OPRK(24)                    | 50.0 ± 50.0 | 47.9 ± 50.0 | 81.2 ± 39.0 | 87.5 ± 33.1 | 83.3 ± 37.3 |
| OPRM(21)                    | 50.0 ± 50.0 | 54.8 ± 49.8 | 88.1 ± 32.4 | 90.5 ± 29.4 | 90.5 ± 29.4 |
| OXYR(3)                     | 50.0 ± 50.0 | 50.0 ± 50.0 | 50.0 ± 50.0 | 66.7 ± 47.1 | 50.0 ± 50.0 |
| SSR1(3)                     | 50.0 ± 50.0 | 50.0 ± 50.0 | 50.0 ± 50.0 | 50.0 ± 50.0 | 50.0 ± 50.0 |
| CCR3(1)                     | 50.0 ± 50.0 | 50.0 ± 50.0 | 50.0 ± 50.0 | 50.0 ± 50.0 | 50.0 ± 50.0 |
| Rhodopsin amine receptors   |             |             |             |             |             |
| 5HT1A(196)                  | 50.0 ± 50.0 | 39.8 ± 48.9 | 53.3 ± 49.9 | 49.0 ± 50.0 | 45.7 ± 49.8 |
| 5HT1B(28)                   | 50.0 ± 50.0 | 50.0 ± 50.0 | 89.3 ± 30.9 | 91.1 ± 28.5 | 89.3 ± 30.9 |
| 5HT1D(172)                  | 50.0 ± 50.0 | 29.7 ± 45.7 | 56.7 ± 49.6 | 59.3 ± 49.1 | 57.3 ± 49.5 |
| 5HT1E(16)                   | 50.0 ± 50.0 | 68.8 ± 46.4 | 93.8 ± 24.2 | 93.8 ± 24.2 | 90.6 ± 29.1 |
| 5HT1F(49)                   | 50.0 ± 50.0 | 41.8 ± 49.3 | 58.2 ± 49.3 | 60.2 ± 48.9 | 56.1 ± 49.6 |
| 5HT2A(79)                   | 50.0 ± 50.0 | 68.4 ± 46.5 | 76.6 ± 42.3 | 77.2 ± 41.9 | 76.6 ± 42.3 |
| 5HT2B(72)                   | 50.0 ± 50.0 | 31.2 ± 46.4 | 70.8 ± 45.5 | 56.9 ± 49.5 | 55.6 ± 49.7 |
| 5HT2C(198)                  | 50.0 ± 50.0 | 35.1 ± 47.7 | 60.4 ± 48.9 | 52.0 ± 50.0 | 48.2 ± 50.0 |
| 5HT4R(87)                   | 50.0 ± 50.0 | 20.1 ± 40.1 | 29.9 ± 45.8 | 34.5 ± 47.5 | 31.6 ± 46.5 |
| 5HT5A(7)                    | 50.0 ± 50.0 | 78.6 ± 41.0 | 64.3 ± 47.9 | 78.6 ± 41.0 | 78.6 ± 41.0 |
| 5HT6R(13)                   | 50.0 ± 50.0 | 92.3 ± 26.6 | 80.8 ± 39.4 | 84.6 ± 36.1 | 88.5 ± 31.9 |
| 5HT7R(15)                   | 50.0 ± 50.0 | 93.3 ± 24.9 | 93.3 ± 24.9 | 90.0 ± 30.0 | 90.0 ± 30.0 |
| ACM1(527)                   | 50.0 ± 50.0 | 30.2 ± 45.9 | 43.3 ± 49.5 | 48.8 ± 50.0 | 45.6 ± 49.8 |
| ACM2(24)                    | 50.0 ± 50.0 | 58.3 ± 49.3 | 81.2 ± 39.0 | 91.7 ± 27.6 | 87.5 ± 33.1 |
| ACM3(58)                    | 50.0 ± 50.0 | 35.3 ± 47.8 | 59.5 ± 49.1 | 73.3 ± 44.3 | 70.7 ± 45.5 |
| ACM4(21)                    | 50.0 ± 50.0 | 90.5 ± 29.4 | 76.2 ± 42.6 | 78.6 ± 41.0 | 81.0 ± 39.3 |
| ACM5(16)                    | 50.0 ± 50.0 | 84.4 ± 36.3 | 84.4 ± 36.3 | 78.1 ± 41.3 | 84.4 ± 36.3 |
| ADA1A(80)                   | 50.0 ± 50.0 | 76.9 ± 42.2 | 97.5 ± 15.6 | 96.2 ± 19.0 | 96.2 ± 19.0 |
| ADA1B(67)                   | 50.0 ± 50.0 | 74.6 ± 43.5 | 91.8 ± 27.5 | 91.0 ± 28.6 | 91.8 ± 27.5 |
| ADA1D(73)                   | 50.0 ± 50.0 | 79.5 ± 40.4 | 98.6 ± 11.6 | 97.9 ± 14.2 | 97.9 ± 14.2 |
| ADA2A(234)                  | 50.0 ± 50.0 | 58.3 ± 49.3 | 93.8 ± 24.1 | 91.0 ± 28.6 | 89.7 ± 30.3 |
| ADA2B(224)                  | 50.0 ± 50.0 | 57.4 ± 49.5 | 97.5 ± 15.5 | 97.3 ± 16.1 | 95.3 ± 21.1 |
| ADA2C(225)                  | 50.0 ± 50.0 | 59.6 ± 49.1 | 94.9 ± 22.0 | 94.2 ± 23.3 | 94.7 ± 22.5 |
| ADRB1(50)                   | 50.0 ± 50.0 | 44.0 ± 49.6 | 87.0 ± 33.6 | 84.0 ± 36.7 | 84.0 ± 36.7 |
| ADRB2(48)                   | 50.0 ± 50.0 | 52.1 ± 50.0 | 95.8 ± 20.0 | 89.6 ± 30.5 | 90.6 ± 29.1 |
| ADRB3(57)                   | 50.0 ± 50.0 | 46.5 ± 49.9 | 86.0 ± 34.7 | 82.5 ± 38.0 | 81.6 ± 38.8 |
| DRD1(100)                   | 50.0 ± 50.0 | 43.0 ± 49.5 | 45.5 ± 49.8 | 43.0 ± 49.5 | 43.0 ± 49.5 |
| DRD2(106)                   | 50.0 ± 50.0 | 50.5 ± 50.0 | 54.7 ± 49.8 | 59.9 ± 49.0 | 55.7 ± 49.7 |
| DRD3(41)                    | 50.0 ± 50.0 | 57.3 ± 49.5 | 70.7 ± 45.5 | 74.4 ± 43.6 | 69.5 ± 46.0 |
| DRD4(143)                   | 50.0 ± 50.0 | 45.8 ± 49.8 | 45.1 ± 49.8 | 51.0 ± 50.0 | 49.3 ± 50.0 |
| DRD5(7)                     | 50.0 ± 50.0 | 57.1 ± 49.5 | 100.0 ± 0.0 | 100.0 ± 0.0 | 100.0 ± 0.0 |
| HRH1(19)                    | 50.0 ± 50.0 | 55.3 ± 49.7 | 57.9 ± 49.4 | 68.4 ± 46.5 | 68.4 ± 46.5 |
| HRH2(22)                    | 50.0 ± 50.0 | 45.5 ± 49.8 | 52.3 ± 49.9 | 56.8 ± 49.5 | 56.8 ± 49.5 |
| HRH3(88)                    | 50.0 ± 50.0 | 39.2 ± 48.8 | 49.4 ± 50.0 | 46.0 ± 49.8 | 46.0 ± 49.8 |
| HRH4(5)                     | 50.0 ± 50.0 | 70.0 ± 45.8 | 90.0 ± 30.0 | 70.0 ± 45.8 | 70.0 ± 45.8 |

| GPCR \ $K_{tar}$              | Dirac       | multitask   | hierarchy   | BP          | PBP         |
|-------------------------------|-------------|-------------|-------------|-------------|-------------|
| Rhodopsin other receptors     |             |             |             |             |             |
| AA1R(56)                      | 50.0 ± 50.0 | 39.3 ± 48.8 | 91.1 ± 28.5 | 92.9 ± 25.8 | 86.6 ± 34.1 |
| AA2AR(73)                     | 50.0 ± 50.0 | 46.6 ± 49.9 | 94.5 ± 22.8 | 96.6 ± 18.2 | 95.2 ± 21.4 |
| AA2BR(83)                     | 50.0 ± 50.0 | 37.3 ± 48.4 | 87.3 ± 33.2 | 98.2 ± 13.3 | 89.2 ± 31.1 |
| AA3R(17)                      | 50.0 ± 50.0 | 38.2 ± 48.6 | 64.7 ± 47.8 | 70.6 ± 45.6 | 52.9 ± 49.9 |
| CLTR1(18)                     | 50.0 ± 50.0 | 50.0 ± 50.0 | 50.0 ± 50.0 | 50.0 ± 50.0 | 52.8 ± 49.9 |
| LT4R1(2)                      | 50.0 ± 50.0 | 50.0 ± 50.0 | 100.0 ± 0.0 | 100.0 ± 0.0 | 100.0 ± 0.0 |
| LT4R2(2)                      | 50.0 ± 50.0 | 50.0 ± 50.0 | 100.0 ± 0.0 | 100.0 ± 0.0 | 100.0 ± 0.0 |
| MTR1A(91)                     | 50.0 ± 50.0 | 43.4 ± 49.6 | 97.3 ± 16.3 | 97.3 ± 16.3 | 95.6 ± 20.5 |
| MTR1B(90)                     | 50.0 ± 50.0 | 47.2 ± 49.9 | 95.6 ± 20.6 | 97.8 ± 14.7 | 97.8 ± 14.7 |
| MTR1L(75)                     | 50.0 ± 50.0 | 46.7 ± 49.9 | 99.3 ± 8.1  | 100.0 ± 0.0 | 99.3 ± 8.1  |
| PAFR(1)                       | 50.0 ± 50.0 | 50.0 ± 50.0 | 50.0 ± 50.0 | 50.0 ± 50.0 | 50.0 ± 50.0 |
| PE2R1(5)                      | 50.0 ± 50.0 | 50.0 ± 50.0 | 100.0 ± 0.0 | 100.0 ± 0.0 | 100.0 ± 0.0 |
| PE2R2(7)                      | 50.0 ± 50.0 | 42.9 ± 49.5 | 92.9 ± 25.8 | 85.7 ± 35.0 | 85.7 ± 35.0 |
| PE2R3(5)                      | 50.0 ± 50.0 | 60.0 ± 49.0 | 100.0 ± 0.0 | 100.0 ± 0.0 | 100.0 ± 0.0 |
| PE2R4(5)                      | 50.0 ± 50.0 | 60.0 ± 49.0 | 100.0 ± 0.0 | 100.0 ± 0.0 | 100.0 ± 0.0 |
| R3R2(1)                       | 50.0 ± 50.0 | 100.0 ± 0.0 | 100.0 ± 0.0 | 100.0 ± 0.0 | 100.0 ± 0.0 |
| TA2R(63)                      | 50.0 ± 50.0 | 42.1 ± 49.4 | 47.6 ± 49.9 | 50.8 ± 50.0 | 49.2 ± 50.0 |
| Metabotropic glutamate family |             |             |             |             |             |
| GABR1(1)                      | 50.0 ± 50.0 | 100.0 ± 0.0 | 100.0 ± 0.0 | 100.0 ± 0.0 | 100.0 ± 0.0 |
| GABR2(1)                      | 50.0 ± 50.0 | 100.0 ± 0.0 | 100.0 ± 0.0 | 50.0 ± 50.0 | 100.0 ± 0.0 |
| MGR1(34)                      | 50.0 ± 50.0 | 42.6 ± 49.5 | 63.2 ± 48.2 | 61.8 ± 48.6 | 64.7 ± 47.8 |
| MGR2(6)                       | 50.0 ± 50.0 | 58.3 ± 49.3 | 100.0 ± 0.0 | 100.0 ± 0.0 | 83.3 ± 37.3 |
| MGR3(5)                       | 50.0 ± 50.0 | 70.0 ± 45.8 | 100.0 ± 0.0 | 100.0 ± 0.0 | 100.0 ± 0.0 |
| MGR5(5)                       | 50.0 ± 50.0 | 90.0 ± 30.0 | 100.0 ± 0.0 | 100.0 ± 0.0 | 100.0 ± 0.0 |
| MGR6(5)                       | 50.0 ± 50.0 | 90.0 ± 30.0 | 90.0 ± 30.0 | 90.0 ± 30.0 | 90.0 ± 30.0 |
| MGR7(6)                       | 50.0 ± 50.0 | 83.3 ± 37.3 | 91.7 ± 27.6 | 83.3 ± 37.3 | 83.3 ± 37.3 |
| MGR8(3)                       | 50.0 ± 50.0 | 83.3 ± 37.3 | 100.0 ± 0.0 | 100.0 ± 0.0 | 100.0 ± 0.0 |
| Secretin family               |             |             |             |             |             |
| VIPR1(1)                      | 50.0 ± 50.0 | 100.0 ± 0.0 | 100.0 ± 0.0 | 50.0 ± 50.0 | 100.0 ± 0.0 |
